# Supplementary material
Source: Springer Nature journal article supplement (https://www.springermedizin.de/resource/supplementary/12913_2012_3005_MOESM4_ESM.pdf/9533296)

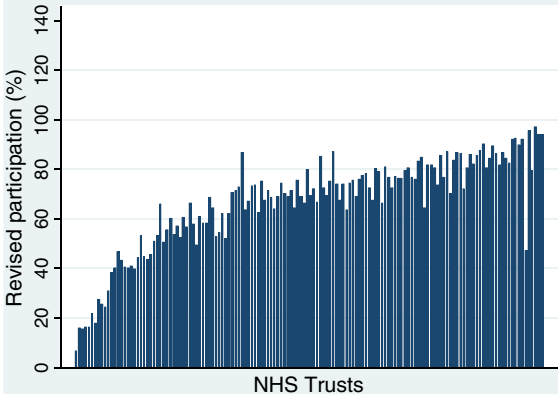

\* ordered by original participation

Supplement: MOESM4 [file 9533296]
